# Supplementary material for: T cell infiltration on local CpG-B delivery in early-stage melanoma is predominantly related to CLEC9A+CD141+ cDC1 and CD14+ antigen-presenting cell recruitment
Source: HighWire-hosted journal article supplement (doi:10.1136/jitc-2020-001962), 2021-03-01
Supplement: jitc-2020-001962supp002_data_supplement.pdf [file jitc-2020-001962supp002_data_supplement.pdf]

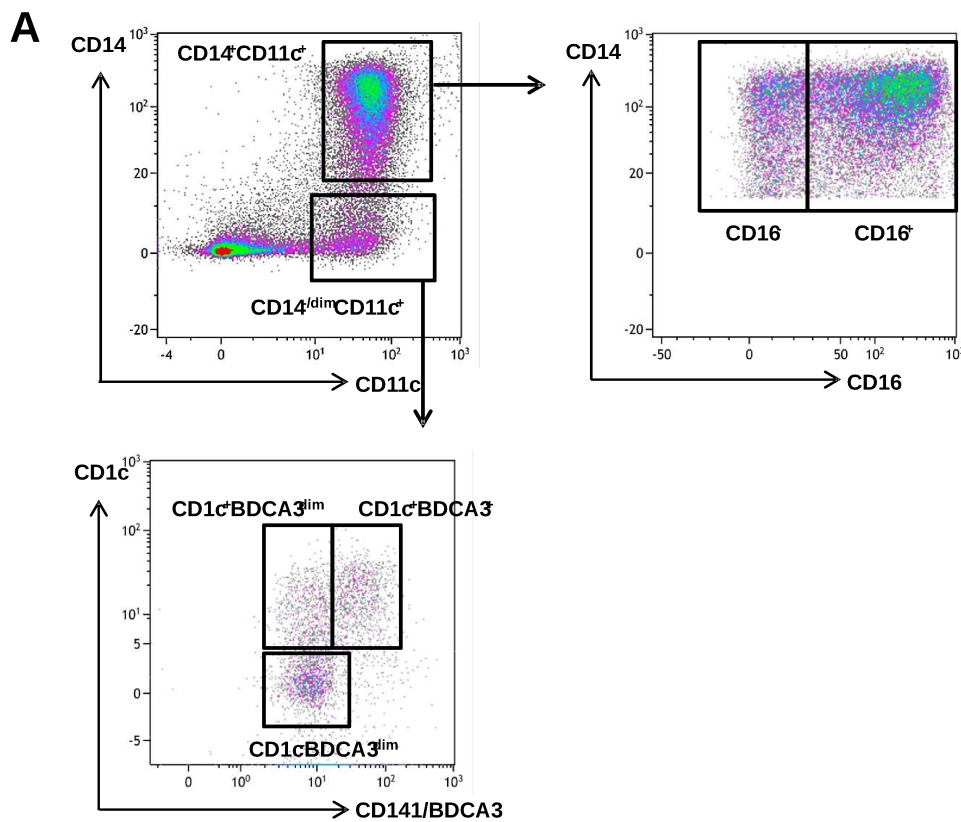

**CD1cBDCA3 (CD14-CD11c<sup>+</sup>)**

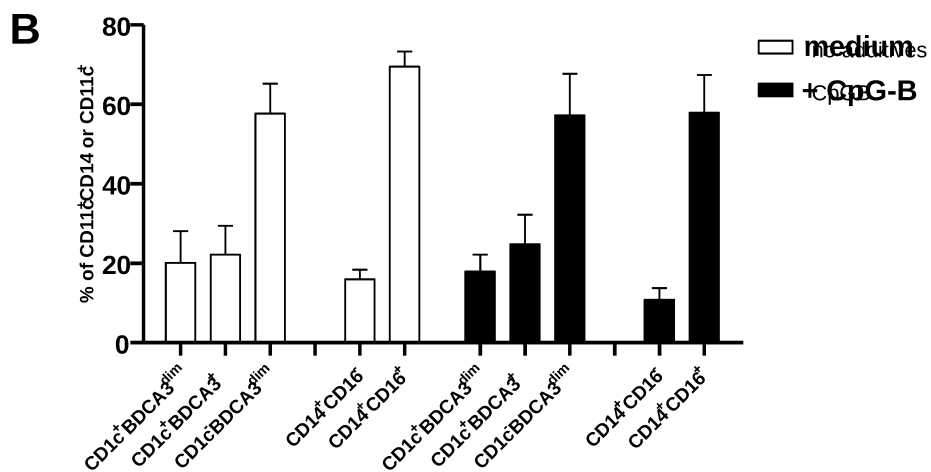

**Supplementary Figure 2**

**Supplementary Figure 2. Myeloid APC subsets in peripheral blood mononuclear cell (PBMC) cultures with CpG-B**

A) Gating strategies for myeloid cDC and monocytic APC subsets from *in vitro* PBMC cultures, and B) their distribution in the control and CpG-B cultures (48h); no significant differences were observed between culture conditions for any of these subset frequencies in a Mann Whitney U test.
